# Supplementary material
Source: Springer Nature journal article supplement (https://www.springermedizin.de/resource/supplementary/12889_2008_1548_MOESM6_ESM.pdf/9503404)

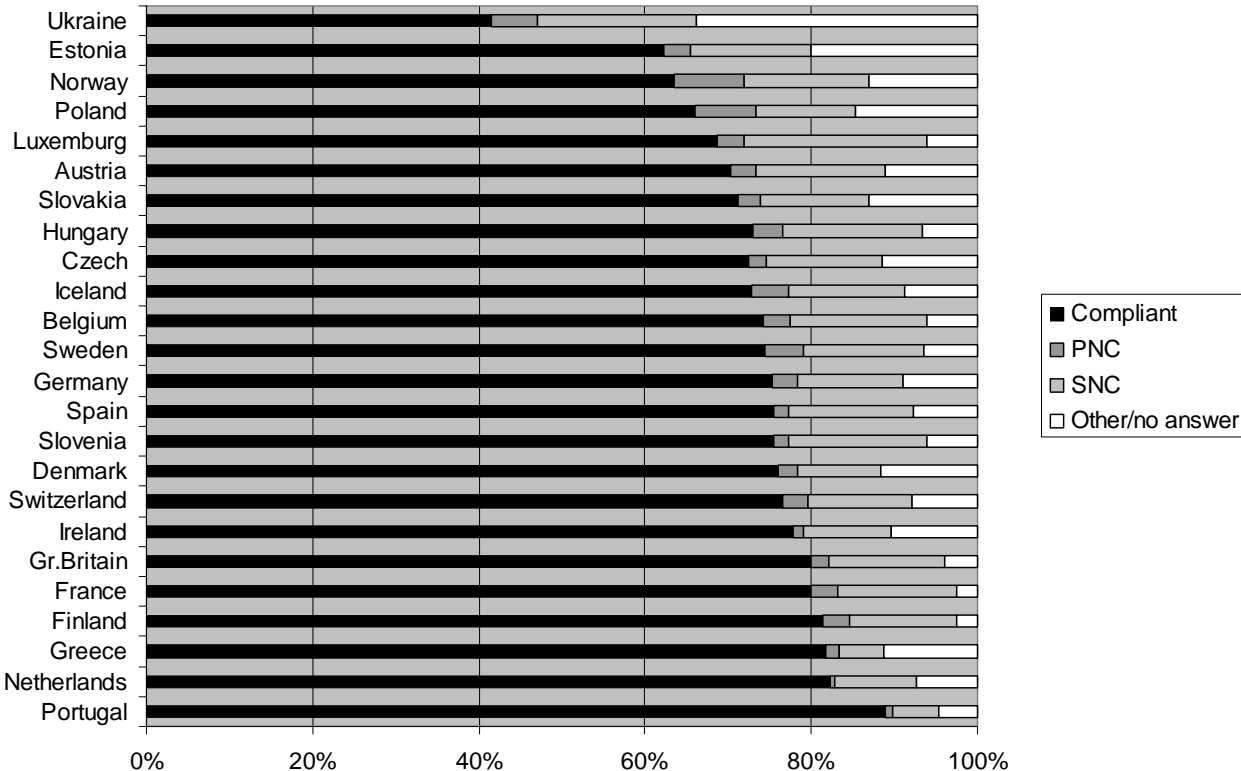

Supplement: MOESM6 [file 9503404]
